# Supplementary material for: Effect of HPSE and HPSE2 SNPs on the Risk of Developing Primary Paraskeletal Multiple Myeloma
Source: MDPI journal article supplement (doi:10.3390/cells12060913), 2023-03-16
Supplement: s1 [file s1]

**Supplementary Table S1. Genotype and allele frequencies of the HPSE gene SNPs in multiple myeloma patients.**

| SNPs       | Genotypes and alleles | Total MM                   |                       | Active MM                  |                       | Controls                   |
|------------|-----------------------|----------------------------|-----------------------|----------------------------|-----------------------|----------------------------|
|            |                       | Number/<br>incidence       | $\chi^2$ /<br>p-value | Number /<br>incidence      | $\chi^2$ /<br>p-value | Number /<br>incidence      |
| rs4693608  | AA                    | 87 (31.8%)                 | NS                    | 64 (28.2%)                 | NS                    | 58 (27.5%)                 |
|            | AG                    | 140 (51.1%)                |                       | 123 (54.2%)                |                       | 112 (53.1%)                |
|            | GG                    | 47 (17.2%)                 |                       | 40 (17.6%)                 |                       | 41 (19.4%)                 |
|            | A<br>G                | 314 (57.3%)<br>234 (42.7%) | NS                    | 251 (55.3%)<br>203 (44.7%) | NS                    | 228 (54.0%)<br>194 (46.0%) |
| rs4693084  | GG                    | 169 (62.6%)                | NS                    | 135 (60.5%)                | NS                    | 131 (62.1%)                |
|            | GT                    | 87 (32.2%)                 |                       | 74 (33.2%)                 |                       | 71 (33.6%)                 |
|            | TT                    | 14 (5.2 %)                 |                       | 14 (6.3%)                  |                       | 9 (4.3%)                   |
|            | G<br>T                | 425 (78.7%)<br>115 (21.3%) | NS                    | 344 (77.1%)<br>102 (22.9%) | NS                    | 333 (78.9%)<br>89 (21.1%)  |
| rs4426765  | AA                    | 159 (58.5%)                | NS                    | 133 (59.1%)                | NS                    | 120 (56.9%)                |
|            | AC                    | 92 (33.8%)                 |                       | 76 (33.8%)                 |                       | 71 (33.6%)                 |
|            | CC                    | 21 (7.7%)                  |                       | 16 (7.1%)                  |                       | 20 (9.5%)                  |
|            | A<br>C                | 410 (75.4%)<br>134 (24.6%) | NS                    | 342 (76.0%)<br>108 (24.0%) | NS                    | 311 (73.7%)<br>111 (26.3%) |
| rs28649799 | AA                    | 225 (82.7%)                | NS                    | 181 (80.4%)                | NS                    | 169 (80.1%)                |
|            | AG                    | 42 (15.4%)                 |                       | 39 (17.3%)                 |                       | 41 (19.4%)                 |
|            | GG                    | 5 (1.8%)                   |                       | 5 (2.2%)                   |                       | 1 (0.5%)                   |
|            | A<br>G                | 492 (90.4%)<br>52 (9.6%)   | NS                    | 401 (89.1%)<br>49 (10.9%)  | NS                    | 379 (89.8%)<br>43 (10.2%)  |
| rs4364254  | TT                    | 150 (54.7%)                | <b>5.04,<br/>0.08</b> | 123 (54.2%)                | <b>4.4,<br/>0.11</b>  | 96 (45.5%)                 |
|            | TC                    | 95 (34.7%)                 |                       | 79 (34.8%)                 |                       | 94 (44.5%)                 |
|            | CC                    | 29 (10.6%)                 |                       | 25 (11.0%)                 |                       | 21 (10.0%)                 |
|            | T<br>C                | 395 (72.1%)<br>153 (27.9%) | NS                    | 325 (71.6%)<br>129 (28.4%) | NS                    | 286 (67.8%)<br>136 (32.2%) |

Significant deviations ( $p < 0.05$ ) are marked in bold.

Total MM group is included patients with multiple myeloma (MM), monoclonal gammopathy (MGUS) and smoldering multiple myeloma (SMM) diseases.
